# Supplementary material for: Morphology-controlled large-scale synthesis of ZnO nanocrystals from bulk ZnO
Source: Royal Society of Chemistry journal article supplement (doi:10.1039/b414948c), 2005-01-01
Supplement: b414948c.pdf [file b414948c.pdf]

# Morphology-controlled large-scale synthesis of ZnO nanocrystals from bulk ZnO

Xinhua Zhong and Wolfgang Knoll

## Supporting Information

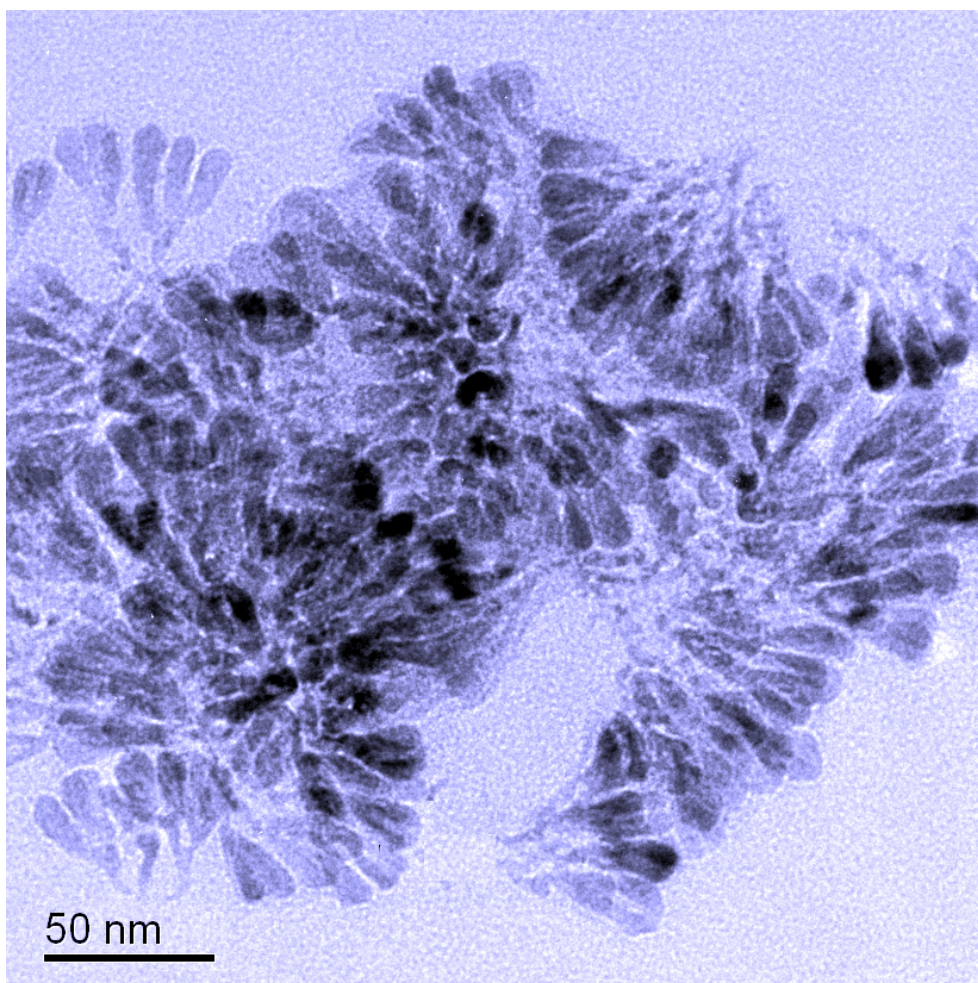

**Figure S1.** Self-assembly of ZnO nano-teardrops into flower-shaped aggregates
